# Supplementary material
Source: HighWire-hosted journal article supplement (https://bmjopen.bmj.com/content/10/7/e036087)
Supplement: inline-supplementary-material-1 [file inline-supplementary-material-1.pdf]

Table S1 Demographic characteristics of the coal miners been measured blood pressure (n=508)

|                            | N=508 | Hypertension | P               |
|----------------------------|-------|--------------|-----------------|
| Sex, n (%)                 |       |              |                 |
| male                       | 494   | 176 (35.6)   | 0.58            |
| female                     | 14    | 6 (42.9)     |                 |
| Age, n (%)                 |       |              |                 |
| ≤30                        | 128   | 35 (27.3)    | <b>0.005</b>    |
| 31-45                      | 256   | 89 (34.77)   |                 |
| >45                        | 124   | 58 (46.78)   |                 |
| Working type, n (%)        |       |              |                 |
| Under ground               | 448   | 167 (37.3)   | <b>0.040</b>    |
| Ground                     | 60    | 15 (25.0)    |                 |
| Working shift, n (%)       |       |              |                 |
| Fixed the day              | 138   | 63 (45.7)    | <b>0.044</b>    |
| Work on two shifts         | 135   | 44 (32.6)    |                 |
| Three shifts               | 235   | 75 (32.0)    |                 |
| Degree of education, n (%) |       |              |                 |
| Middle school or below     | 246   | 92 (37.4)    | 0.47            |
| Middle school above        | 262   | 90 (34.4)    |                 |
| Marital status, n (%)      |       |              |                 |
| Spinsterhood               | 34    | 9 (26.5)     | 0.36            |
| First marriage             | 446   | 167 (37.4)   |                 |
| Other                      | 28    | 12 (42.9)    |                 |
| Annual income, n (%)       |       |              |                 |
| ≤60,000                    | 368   | 133 (36.1)   | 0.81            |
| >60,000                    | 140   | 49 (35.0)    |                 |
| Smoking, n (%)             |       |              |                 |
| Yes                        | 206   | 82 (39.8)    | 0.12            |
| No                         | 302   | 100 (33.1)   |                 |
| Drinking, n (%)            |       |              |                 |
| Yes                        | 251   | 101 (40.2)   | <b>0.04</b>     |
| No                         | 257   | 81 (31.5)    |                 |
| BMI                        |       |              |                 |
| underweighted              | 1     | 0 (0)        | <b>&lt;0.01</b> |
| Normal                     | 339   | 93 (27.4)    |                 |
| Overweight                 | 83    | 37 (44.6)    |                 |
| Obesity                    | 85    | 52(61.2)     |                 |
| ERI                        |       |              |                 |
| ERI >1                     | 43    | 18 (41.9)    | <b>&lt;0.01</b> |
| ERI ≤ 1                    | 465   | 164 (35.3)   |                 |
| Depression                 |       |              | <b>&lt;0.01</b> |
| no                         | 154   | 32 (20.8)    |                 |

|                   |     |           |      |
|-------------------|-----|-----------|------|
| mild              | 113 | 49 (43.3) |      |
| moderate          | 153 | 38 (24.8) |      |
| severe            | 88  | 62 (70.5) |      |
| Job burnout level |     |           |      |
| No                | 27  | 8 (29.6)  | 0.35 |
| Mild              | 140 | 47 (33.6) |      |
| Moderate          | 282 | 110 (39)  |      |
| Severe            | 59  | 17 (28.8) |      |

---

Underground included: coal digger, driver, electrical fitter, hauler, and safety worker.
